# Supplementary material for: Development of lung diffusion to adulthood following extremely preterm birth
Source: PubMed Central journal article supplement — Eur Respir J. 2022 May 19;59(5):2004103. doi: 10.1183/13993003.04103-2020 (PMC9117733; doi:10.1183/13993003.04103-2020), 2022-05-19

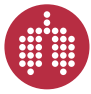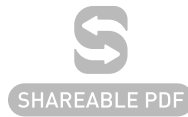

# Development of lung diffusion to adulthood following extremely preterm birth

Emma Satrell<sup>1,2</sup>, Hege Clemm <sup>1,3</sup>, Ola Drange Røksund <sup>3,4</sup>, Karl Ove Hufthammer <sup>5</sup>, Einar Thorsen<sup>1</sup>, Thomas Halvorsen <sup>1,3</sup> and Maria Vollsæter<sup>1,3</sup>

<sup>1</sup>Dept of Clinical Science, University of Bergen, Bergen, Norway. <sup>2</sup>Dept of Pediatric and Adolescent Medicine, Drammen Hospital, Vestre Viken Hospital Trust, Drammen, Norway. <sup>3</sup>Dept of Pediatric and Adolescent Medicine, Haukeland University Hospital, Bergen, Norway. <sup>4</sup>Faculty of Health and Social Sciences, Western Norway University of Applied Sciences, Bergen, Norway. <sup>5</sup>Centre for Clinical Research, Haukeland University Hospital, Bergen, Norway.

Corresponding author: Emma Satrell ([emma.satrell@uib.no](mailto:emma.satrell@uib.no))

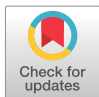

Shareable abstract (@ERSpublications)

**Pulmonary diffusing capacity following extremely preterm (EP) birth was reduced compared with term-born subjects. From mid-childhood to adulthood, development tracked in parallel in the EP and term-born groups, with preterms following lower trajectories.** <https://bit.ly/3ARPD7D>

**Cite this article as:** Satrell E, Clemm H, Røksund OD, *et al.* Development of lung diffusion to adulthood following extremely preterm birth. *Eur Respir J* 2022; 59: 2004103 [DOI: 10.1183/13993003.04103-2020].

This single-page version can be shared freely online.

Copyright ©The authors 2022.

This version is distributed under the terms of the Creative Commons Attribution Non-Commercial Licence 4.0. For commercial reproduction rights and permissions contact [permissions@ersnet.org](mailto:permissions@ersnet.org)

Received: 6 Nov 2020  
Accepted: 21 Sept 2021

## Abstract

**Background** Gas exchange in extremely preterm (EP) infants must take place in fetal lungs. Childhood lung diffusing capacity of the lung for carbon monoxide ( $D_{LCO}$ ) is reduced; however, longitudinal development has not been investigated. We describe the growth of  $D_{LCO}$  and its subcomponents to adulthood in EP compared with term-born subjects.

**Methods** Two area-based cohorts born at gestational age  $\leq 28$  weeks or birthweight  $\leq 1000$  g in 1982–1985 ( $n=48$ ) and 1991–1992 ( $n=35$ ) were examined twice, at ages 18 and 25 years and 10 and 18 years, respectively, and compared with matched term-born controls. Single-breath  $D_{LCO}$  was measured at two oxygen pressures, with subcomponents (membrane diffusion ( $D_M$ ) and pulmonary capillary blood volume ( $V_C$ )) calculated using the Roughton–Forster equation.

**Results** Age-, sex- and height-standardised transfer coefficients for carbon monoxide ( $K_{CO}$ ) and  $D_{LCO}$  were reduced in EP compared with term-born subjects, and remained so during puberty and early adulthood ( $p$ -values for all time-points and both cohorts  $\leq 0.04$ ), whereas alveolar volume ( $V_A$ ) was similar. Development occurred in parallel to term-born controls, with no signs of pubertal catch-up growth nor decline at age 25 years ( $p$ -values for lack of parallelism within cohorts 0.99, 0.65, 0.71, 0.94 and 0.44 for  $z$ - $D_{LCO}$ ,  $z$ - $V_A$ ,  $z$ - $K_{CO}$ ,  $D_M$  and  $V_C$ , respectively). Split by membrane and blood volume components, findings were less clear; however, membrane diffusion seemed most affected.

**Conclusions** Pulmonary diffusing capacity was reduced in EP compared with term-born subjects, and development from childhood to adulthood tracked in parallel to term-born subjects, with no signs of catch-up growth nor decline at age 25 years.

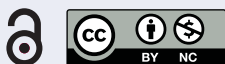

Supplement: ERJ-04103-2020.Shareable.pdf [file ERJ-04103-2020.Shareable.pdf]
