# Supplementary material for: Development of lung diffusion to adulthood following extremely preterm birth
Source: PubMed Central journal article supplement — Eur Respir J. 2022 May 19;59(5):2004103. doi: 10.1183/13993003.04103-2020 (PMC9117733; doi:10.1183/13993003.04103-2020), 2022-05-19
Supplement: ERJ-04103-2020.Table_A.pdf [file ERJ-04103-2020.Table_A.pdf]

**Supplemental Table A.** Raw data for lung diffusing capacity from 10 to 25 years of age for extreme preterm subjects compared to term-born control subjects (n = 160\*).

| Examination                                                                         | 1991–1992 cohort |        |    |      |                  |        |    |       | 1982–1985 cohort |        |    |      |                  |        |    |       |
|-------------------------------------------------------------------------------------|------------------|--------|----|------|------------------|--------|----|-------|------------------|--------|----|------|------------------|--------|----|-------|
|                                                                                     | First follow-up  |        |    |      | Second follow-up |        |    |       | First follow-up  |        |    |      | Second follow-up |        |    |       |
|                                                                                     | 10.6 (0.4) years |        |    |      | 17.8 (0.4) years |        |    |       | 17.7 (1.2) years |        |    |      | 24.9 (1.2) years |        |    |       |
| Age, mean (SD)                                                                      | Mean             | 95% CI |    |      | Mean             | 95% CI |    |       | Mean             | 95% CI |    |      | Mean             | 95% CI |    |       |
| <b>DL<sub>CO</sub></b> (mmol·min <sup>-1</sup> ·kPa <sup>-1</sup> )                 |                  |        |    |      |                  |        |    |       |                  |        |    |      |                  |        |    |       |
| Term-born                                                                           | 5.4              | 5.2    | to | 5.6  | 8.7              | 7.8    | to | 9.6   | 8.9              | 8.3    | to | 9.5  | 9.6              | 8.9    | to | 10.4  |
| EP-born                                                                             | 4.4              | 4.1    | to | 4.7  | 7.9              | 7.2    | to | 8.6   | 8.0              | 7.4    | to | 8.5  | 8.7              | 8.1    | to | 9.4   |
| <b>V<sub>A</sub></b> (liter)                                                        |                  |        |    |      |                  |        |    |       |                  |        |    |      |                  |        |    |       |
| Term-born                                                                           | 3.0              | 2.9    | to | 3.1  | 5.2              | 4.8    | to | 5.6   | 5.6              | 5.3    | to | 5.9  | 5.9              | 5.5    | to | 6.3   |
| EP-born                                                                             | 2.7              | 2.5    | to | 2.8  | 5.0              | 4.6    | to | 5.3   | 5.3              | 5.0    | to | 5.6  | 5.7              | 5.3    | to | 6.0   |
| <b>K<sub>CO</sub></b> (mmol·min <sup>-1</sup> ·kPa <sup>-1</sup> ·L <sup>-1</sup> ) |                  |        |    |      |                  |        |    |       |                  |        |    |      |                  |        |    |       |
| Term-born                                                                           | 1.8              | 1.8    | to | 1.9  | 1.7              | 1.6    | to | 1.8   | 1.6              | 1.5    | to | 1.7  | 1.6              | 1.6    | to | 1.7   |
| EP-born                                                                             | 1.7              | 1.6    | to | 1.7  | 1.6              | 1.5    | to | 1.7   | 1.5              | 1.4    | to | 1.6  | 1.5              | 1.5    | to | 1.6   |
| <b>D<sub>M</sub></b> (mmol·min <sup>-1</sup> ·kPa <sup>-1</sup> )                   |                  |        |    |      |                  |        |    |       |                  |        |    |      |                  |        |    |       |
| Term-born                                                                           | 9.7              | 9.0    | to | 10.5 | 15.1             | 13.6   | to | 16.6  | 17.0             | 15.6   | to | 18.4 | 17.0             | 15.6   | to | 18.5  |
| EP-born                                                                             | 7.4              | 6.5    | to | 8.3  | 13.2             | 11.5   | to | 14.8  | 15.0             | 13.4   | to | 16.6 | 15.3             | 13.4   | to | 17.2  |
| <b>V<sub>C</sub></b> (mL)                                                           |                  |        |    |      |                  |        |    |       |                  |        |    |      |                  |        |    |       |
| Term-born                                                                           | 52.5             | 48.2   | to | 56.8 | 86.9             | 73.5   | to | 100.2 | 79.4             | 73.8   | to | 85.1 | 92.9             | 85.2   | to | 100.6 |
| EP-born                                                                             | 51.3             | 43.5   | to | 59.0 | 52.6             | 74.8   | to | 90.4  | 72.6             | 68.0   | to | 77.1 | 91.8             | 84.5   | to | 99.2  |

Abbreviations: SD: standard deviation; CI: confidence interval; DL<sub>CO</sub>: Diffusing capacity of the lung for carbon monoxide; V<sub>A</sub>: Alveolar volume; K<sub>CO</sub>: Transfer coefficient of the lung for carbon monoxide; D<sub>M</sub>: Alveolar-capillary membrane conductance; V<sub>C</sub>: Pulmonary-capillary blood volume.

The numbers are estimated group means with 95% confidence interval. The values are reported as absolute numbers.

\* The number of subjects included in at least one regression model. The number of cases and controls for each variable and at each time point is shown in Figure 1 in the main paper.
