# Supplementary material for: Development of lung diffusion to adulthood following extremely preterm birth
Source: PubMed Central journal article supplement — Eur Respir J. 2022 May 19;59(5):2004103. doi: 10.1183/13993003.04103-2020 (PMC9117733; doi:10.1183/13993003.04103-2020), 2022-05-19
Supplement: ERJ-04103-2020.Table_B.pdf [file ERJ-04103-2020.Table_B.pdf]

**Supplemental Table B-** Lung Diffusing capacity in two cohorts of extremely preterm and term-born subjects born 1991–1992 and 1982–1985, stratified by grade of BPD severity (n = 160\*).

| Examination              | 1991–1992 cohort |        |    |      |                  |        |    |       | 1982–1985 cohort |        |    |      |                  |        |    |       |
|--------------------------|------------------|--------|----|------|------------------|--------|----|-------|------------------|--------|----|------|------------------|--------|----|-------|
|                          | First follow-up  |        |    |      | Second follow-up |        |    |       | First follow-up  |        |    |      | Second follow-up |        |    |       |
|                          | 10.6 (0.4) years |        |    |      | 17.8 (0.4) years |        |    |       | 17.7 (1.2) years |        |    |      | 24.9 (1.2) years |        |    |       |
| Age, mean (SD)           | Mean             | 95% CI |    |      | Mean             | 95% CI |    |       | Mean             | 95% CI |    |      | Mean             | 95% CI |    |       |
| <b>Z-DL<sub>co</sub></b> |                  |        |    |      |                  |        |    |       |                  |        |    |      |                  |        |    |       |
| Term-born                | -0.3             | -0.6   | to | 0.0  | 0.2              | -0.1   | to | 0.6   | -0.3             | -0.6   | to | -0.0 | 0.0              | -0.2   | to | 0.3   |
| EP non/mild BPD          | -1.4             | -1.8   | to | -1.0 | -0.7             | -1.1   | to | -0.3  | -0.8             | -1.2   | to | -0.5 | -0.6             | -1.0   | to | -0.3  |
| EP mod/sev BPD           | -0.7             | -1.2   | to | -0.2 | -0.4             | -1.0   | to | 0.1   | -0.9             | -1.4   | to | -0.3 | -0.2             | -0.8   | to | 0.4   |
| <b>Z-V<sub>A</sub></b>   |                  |        |    |      |                  |        |    |       |                  |        |    |      |                  |        |    |       |
| Term-born                | -0.4             | -0.7   | to | -0.1 | 0.1              | -0.2   | to | 0.4   | 0.1              | -0.2   | to | 0.4  | -0.0             | -0.3   | to | 0.2   |
| EP non/mild BPD          | -0.8             | -1.2   | to | -0.4 | -0.5             | -0.9   | to | -0.1  | 0.1              | -0.2   | to | 0.4  | 0.0              | -0.3   | to | 0.3   |
| EP mod/sev BPD           | -0.6             | -1.1   | to | -0.1 | 0.1              | -0.5   | to | 0.6   | -0.1             | -0.6   | to | 0.4  | -0.0             | -0.5   | to | 0.5   |
| <b>Z-K<sub>co</sub></b>  |                  |        |    |      |                  |        |    |       |                  |        |    |      |                  |        |    |       |
| Term-born                | 0.0              | -0.3   | to | 0.3  | 0.1              | -0.3   | to | 0.5   | -0.4             | -0.7   | to | -0.1 | 0.1              | -0.2   | to | 0.4   |
| EP non/mild BPD          | -0.8             | -1.2   | to | -0.3 | -0.4             | -0.8   | to | 0.1   | -1.0             | -1.3   | to | -0.6 | -0.6             | -1.0   | to | -0.3  |
| EP mod/sev BPD           | -0.3             | -0.9   | to | 0.3  | -0.5             | -1.1   | to | 0.1   | -0.8             | -1.4   | to | -0.2 | -0.3             | -0.9   | to | 0.3   |
| <b>D<sub>M</sub></b>     |                  |        |    |      |                  |        |    |       |                  |        |    |      |                  |        |    |       |
| Term-born                | 9.7              | 8.3    | to | 11.2 | 15.1             | 13.5   | to | 16.7  | 17.0             | 15.7   | to | 18.2 | 17.0             | 15.6   | to | 18.3  |
| EP non/mild BPD          | 7.7              | 5.8    | to | 9.5  | 12.4             | 10.5   | to | 14.3  | 15.5             | 13.9   | to | 17.1 | 15.5             | 13.9   | to | 17.1  |
| EP mod/sev BPD           | 7.2              | 4.7    | to | 9.7  | 14.8             | 12.2   | to | 17.4  | 14.7             | 12.2   | to | 17.2 | 15.2             | 12.6   | to | 17.8  |
| <b>V<sub>c</sub></b>     |                  |        |    |      |                  |        |    |       |                  |        |    |      |                  |        |    |       |
| Term-born                | 52.5             | 45.6   | to | 59.3 | 86.8             | 78.8   | to | 94.8  | 79.4             | 73.5   | to | 85.4 | 93.0             | 86.4   | to | 99.6  |
| EP non/mild BPD          | 48.5             | 39.5   | to | 57.5 | 78.8             | 69.6   | to | 88.0  | 71.2             | 63.4   | to | 79.0 | 90.1             | 82.4   | to | 97.9  |
| EP mod/sev BPD           | 58.2             | 46.0   | to | 70.3 | 90.4             | 77.7   | to | 103.1 | 75.6             | 63.4   | to | 87.8 | 97.5             | 84.7   | to | 110.2 |

---

Abbreviations: SD: standard deviation; CI: confidence interval; DL<sub>CO</sub>: Diffusing capacity of the lung for carbon monoxide; V<sub>A</sub>: Alveolar volume; K<sub>CO</sub>: Transfer coefficient of the lung for carbon monoxide; D<sub>M</sub>: Alveolar-capillary membrane conductance; V<sub>C</sub>: Pulmonary-capillary blood volume.

The numbers are estimated group means with 95% confidence interval from longitudinal mixed-effects models. The values for DL<sub>CO</sub>, V<sub>A</sub>, and K<sub>CO</sub> are reported as Z-scores, while values for D<sub>M</sub> and V<sub>C</sub> are absolute numbers. D<sub>M</sub>= mmol/min/kPa, V<sub>C</sub>= ml.

\* The number of subjects included in at least one regression model. The number of cases and controls for each variable and at each time point is shown in Figure 1 in the main paper.
